# Supplementary material for: Synthesis of amino-functionalized MCM-41 via direct co-condensation and post-synthesis grafting methods using mono-, di- and tri-amino-organoalkoxysilanesElectronic supplementary information (ESI) available: XRD patterns of (A) x-dNN-MCM-41 and (B) x-dNNN-MCM-41 after the extraction of the surfactant, 29Si MAS NMR spectra of MCM-41 samples prepared by (A) direct co-condensation and (B) post-synthesis grafting methods. See http://www.rsc.org/suppdata/jm/b3/b310576h/
Source: Royal Society of Chemistry journal article supplement (doi:10.1039/b310576h), 2004-01-01
Supplement: b310576h.pdf [file b310576h.pdf]

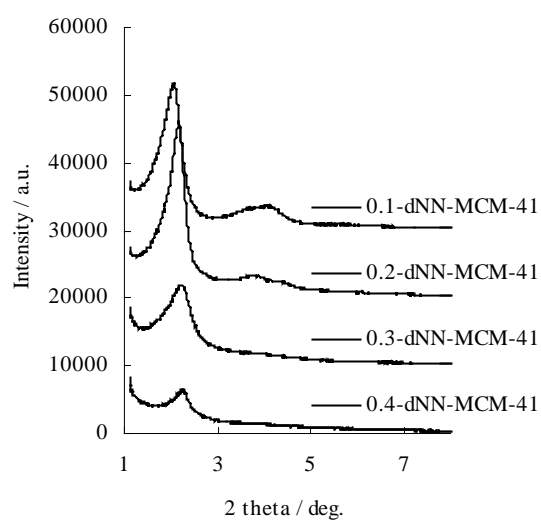

(A) x-dNN-MCM-41

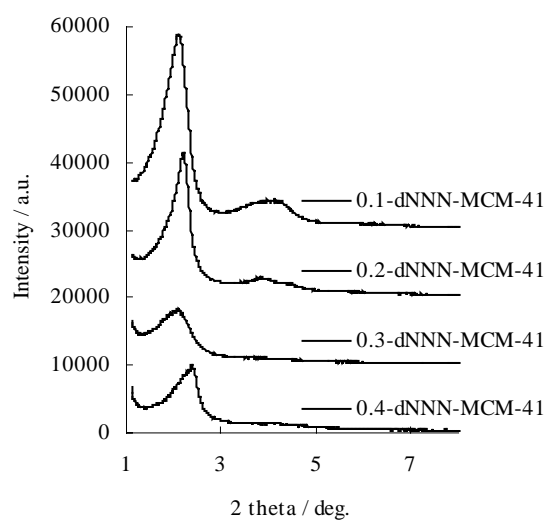

(B) x-dNNN-MCM-41

**Fig. S1** XRD patterns of (A) x-dNN-MCM-41 and (B) x-dNNN-MCM-41 after the extraction of the surfactant; where x was the proportion of the NN or NNN silanes in the Si sources.

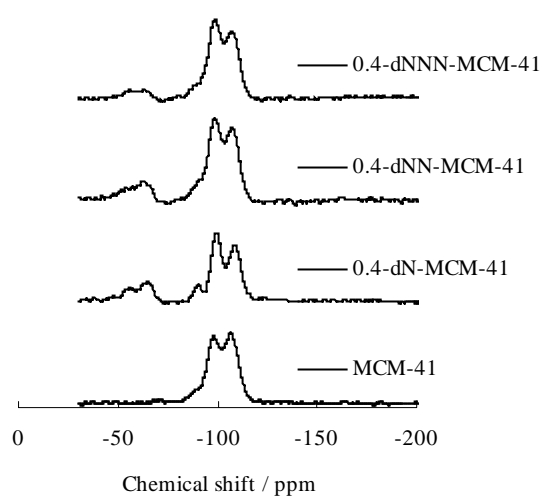

(A) Direct co-condensation method

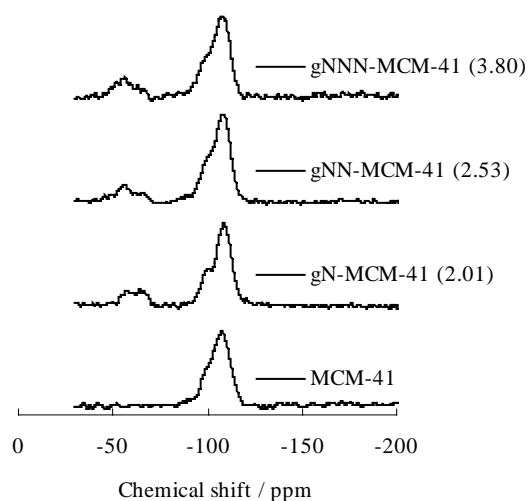

(B) Post-synthesis grafting method

**Fig. S2**  $^{29}\text{Si}$  MAS NMR spectra of amino-functionalized MCM-41 samples via direct co-condensation method (A): the surfactant-extracted MCM-41, and 0.4-dN-MCM-41, 0.4-dNN-MCM-41 and 0.4-dNNN-MCM-41, and via post-synthesis grafting method (B): the calcined MCM-41, and gN-MCM-41, gNN-MCM-41 and gNNN-MCM-41 under maximum level for silylations, where numbers in parentheses are fixed amino groups /  $\text{mmol}\cdot\text{g}^{-1}$  (See Table 2).
